# Supplementary material
Source: publisher figshare collection journal article supplement (https://acs.figshare.com/ndownloader/files/3962287)

## Supporting Information

### **Unusual Coupling Reaction of C<sub>60</sub> and Benzonitrile with Triosmium Carbonyls to Generate Fullerodiketimide Cluster Complexes**

Yi-Sin Lin and Wen-Yann Yeh

#### **Experimental**

**General Methods.** All manipulations were carried out under an atmosphere of purified dinitrogen with standard Schlenk techniques. Solvents were dried over appropriate reagents under dinitrogen and distilled immediately before use. Os<sub>3</sub>(CO)<sub>12</sub> (Strem) and C<sub>60</sub> (99%; Bucky USA) were used as received. Preparative thin-layer chromatographic (TLC) plates were prepared from silica gel (Merck). Infrared spectra were recorded on a Jasco FT/IR-4100 IR spectrometer. <sup>1</sup>H NMR spectra were obtained on a Varian Unity INOVA-500 spectrometer at 500 MHz. UV-Vis spectra were recorded from 200 to 700 nm in dichloromethane by using a 1.0 cm quartz cell with an Agilent 8452 spectrophotometer. Matrix-assisted laser desorption ionization (MALDI) mass spectra were recorded on a Bruker Microflex-LT mass spectrometer. High-resolution mass spectra (HRMS) were measured with a Finnigan/Thermo Quest MAT mass spectrometer.

**Reaction of Os<sub>3</sub>(CO)<sub>12</sub> and C<sub>60</sub> in Refluxed *o*-Dichlorobenzene Solution.** A solution of C<sub>60</sub> (80 mg, 0.11 mmol) and Os<sub>3</sub>(CO)<sub>12</sub> (100 mg, 0.11 mmol), in *o*-dichlorobenzene (50 mL) was refluxed under dinitrogen for 3 h. The volatile materials were removed under vacuum, and the residue was purified by TLC (silica gel), eluting with CS<sub>2</sub>. Os<sub>3</sub>(CO)<sub>9</sub>(μ<sub>3</sub>, η<sup>6</sup>-C<sub>60</sub>) (**1**; 34 mg, 20%) was obtained from the second brown band.

**Reaction of Os<sub>3</sub>(CO)<sub>12</sub> and C<sub>60</sub> in Refluxed Benzonitrile/Chlorobenzene Solution.** A

solution of C<sub>60</sub> (32 mg, 0.044 mmol) and Os<sub>3</sub>(CO)<sub>12</sub> (20 mg, 0.022 mmol) in benzonitrile (0.5 mL) and chlorobenzene (10 mL) was refluxed under dinitrogen for 10 h. The reaction was monitored by IR and analytical TLC. No evidence for the formation of **1**, **2**, and **3** were observed.

**Reaction of Os<sub>3</sub>(CO)<sub>12</sub> and C<sub>60</sub> in Refluxed Chlorobenzene Solution.** A solution of C<sub>60</sub> (16 mg, 0.022 mmol) and Os<sub>3</sub>(CO)<sub>12</sub> (10 mg, 0.011 mmol) in chlorobenzene (5 mL) was refluxed under dinitrogen for 24 h. The volatile materials were removed under vacuum, and the residue was purified by TLC (silica gel), eluting with CS<sub>2</sub>/CH<sub>2</sub>Cl<sub>2</sub> (80:1). Os<sub>3</sub>(CO)<sub>9</sub>(μ<sub>3</sub>,η<sup>6</sup>-C<sub>60</sub>) (**1**; 4.4 mg, 26%) was obtained.

**Reaction of Os<sub>3</sub>(CO)<sub>10</sub>(NCPh)<sub>2</sub> and C<sub>60</sub> in Refluxed Chlorobenzene Solution.** C<sub>60</sub> (14 mg, 0.019 mmol) and Os<sub>3</sub>(CO)<sub>10</sub>(NCPh)<sub>2</sub> (10 mg, 0.0095 mmol) in chlorobenzene (10 mL) was refluxed under dinitrogen for 30 min. The volatile materials were removed under vacuum, and the residue was purified by TLC (silica gel), eluting with CS<sub>2</sub>/CH<sub>2</sub>Cl<sub>2</sub> (80:1). Compound **1** (18%) was obtained.

**Reaction of Os<sub>3</sub>(CO)<sub>10</sub>(NCPh)<sub>2</sub> and C<sub>60</sub> in Refluxed Benzonitrile/Chlorobenzene Solution.** A solution of C<sub>60</sub> (14 mg, 0.019 mmol) and Os<sub>3</sub>(CO)<sub>10</sub>(NCPh)<sub>2</sub> (10 mg, 0.0095 mmol) in benzonitrile (0.5 mL) and *o*-dichlorobenzene (10 mL) was refluxed under dinitrogen for 3 h. The reaction was monitored by IR and analytical TLC. No evidences for the formation of **1**, **2**, and **3** were observed.

**Reaction of **1** and C<sub>60</sub> in Refluxed Benzonitrile/*o*-Dichlorobenzene Solution.** A solution of C<sub>60</sub> (3 mg, 0.004 mmol) and Os<sub>3</sub>(CO)<sub>9</sub>(μ<sub>3</sub>,η<sup>6</sup>-C<sub>60</sub>) (**1**; 5 mg, 0.0032 mmol) in benzonitrile (0.25 mL) and *o*-dichlorobenzene (5 mL) was refluxed under dinitrogen for 3 h. The reaction was monitored by IR and analytical TLC. No evidence for the formation of **2** and **3** were observed.

**Thermolysis of **2** in Refluxed Benzonitrile Solution.** A solution of **2** (5 mg) in benzonitrile (5 mL) was refluxed under dinitrogen for 2 h. The reaction monitored by IR showed slow transformation from **2** to **3**.

**Thermolysis of **3** in Refluxed *o*-Dichlorobenzene Solution.** A solution of **3** (5 mg) in benzonitrile *o*-dichlorobenzene (5 mL) was refluxed under dinitrogen for 5 h. The volatile materials were removed under vacuum, and the residue was applied on TLC (silica gel), eluting with

CS<sub>2</sub>/CH<sub>2</sub>Cl<sub>2</sub> (80:1). This reaction led to severe decomposition of **3**, and only a small amount of **2** (<0.3 mg) was obtained. Formation of **2** is likely from reaction of **3** and CO (from decomposition of **3** in solution).

**Cyclic Voltammetric Measurements for 2 and 3.** Electrochemical measurements were taken with a CV 50 W system. Cyclic voltammetry was performed with a Pt button working electrode, a Pt-wire auxiliary electrode and an Ag/AgCl reference electrode. The experiments were carried out with 1 mM solution of **2** and **3**, respectively, in dry *o*-dichlorobenzene containing 0.1 M (*n*-C<sub>4</sub>H<sub>9</sub>)<sub>4</sub>NPF<sub>6</sub> as the supporting electrolyte. Potential was scanned at 10 mV s<sup>-1</sup> at 27 °C. Under these conditions, ferrocene shows a reversible one-electron redox wave with E<sub>1/2</sub> = 420 mV.

**Structure Determination for 2 and 3.** The crystals of **2**·3CS<sub>2</sub> and **3**·2CS<sub>2</sub> suitable for X-ray analysis were each mounted in a thin-walled glass capillary and aligned on the Nonius Kappa CCD diffractometer, with graphite-monochromated Mo K $\alpha$  radiation ( $\lambda$  = 0.71073 Å). The  $\theta$  range for data collection is 1.24 to 25.11° for **2**·3CS<sub>2</sub> and 1.64 to 25.02° for **3**·3CS<sub>2</sub>. Of the 44037 and 63749 reflections collected, 17411 and 16050 reflections were independent for **2**·3CS<sub>2</sub> and **3**·3CS<sub>2</sub>, respectively. All data were corrected for Lorentz and polarization effects and for the effects of absorption. Heavily disordered solvent molecules were removed from the diffraction data for **2** (may be 2 CS<sub>2</sub>) and **3** (may be 1 CS<sub>2</sub>) using the SQUEEZE program. The structures were solved by the direct method and refined by least-square cycles. Hydrogen atoms were included but not refined. All calculations were performed using the SHELXTL-97 package.

**Table S-1. Crystallographic Data for 2·3CS<sub>2</sub> and 3·2CS<sub>2</sub>.**

|                                                | <b>2·3CS<sub>2</sub></b>                                                                      | <b>3·2CS<sub>2</sub></b>                                                                      |
|------------------------------------------------|-----------------------------------------------------------------------------------------------|-----------------------------------------------------------------------------------------------|
| chem formula                                   | C <sub>149</sub> H <sub>15</sub> N <sub>3</sub> O <sub>5</sub> Os <sub>3</sub> S <sub>6</sub> | C <sub>154</sub> H <sub>20</sub> N <sub>4</sub> O <sub>4</sub> Os <sub>3</sub> S <sub>4</sub> |
| cryst syst                                     | triclinic                                                                                     | monoclinic                                                                                    |
| fw                                             | 2689.60                                                                                       | 2688.58                                                                                       |
| <i>T</i> , K                                   | 200(2)                                                                                        | 200(2)                                                                                        |
| space group                                    | <i>P</i> $\bar{1}$                                                                            | <i>P</i> 2 <sub>1</sub> /c                                                                    |
| <i>a</i> , Å                                   | 17.2115(11)                                                                                   | 27.076(3)                                                                                     |
| <i>b</i> , Å                                   | 18.9698(14)                                                                                   | 14.7591(19)                                                                                   |
| <i>c</i> , Å                                   | 19.1654(14)                                                                                   | 25.284(3)                                                                                     |
| <i>α</i> , deg                                 | 99.957(5)                                                                                     | 90                                                                                            |
| <i>β</i> , deg                                 | 113.190(4)                                                                                    | 114.453(7)                                                                                    |
| <i>γ</i> , deg                                 | 111.212(4)                                                                                    | 90                                                                                            |
| <i>V</i> , Å <sup>3</sup>                      | 4985.8(6)                                                                                     | 9198(2)                                                                                       |
| <i>Z</i>                                       | 2                                                                                             | 4                                                                                             |
| <i>D</i> <sub>calc</sub> , g cm <sup>-3</sup>  | 1.792                                                                                         | 1.942                                                                                         |
| <i>μ</i> , mm <sup>-1</sup>                    | 4.009                                                                                         | 4.302                                                                                         |
| <i>R</i> <sub>1</sub> / <i>wR</i> <sub>2</sub> | 0.1050/0.3027                                                                                 | 0.0688/0.1594                                                                                 |
| GOF on <i>F</i> <sup>2</sup>                   | 1.017                                                                                         | 0.924                                                                                         |

**Figure S-1.** ORTEP diagram of **2** with 30% probability ellipsoids. Selected bond distances (Å): Os1–Os2 = 2.887(1), Os1–Os3 = 2.972(1), Os2···Os3 = 3.282(1), Os1–N1 = 2.06(2), Os2–N1 = 2.03(2), Os2–N2 = 2.00(2), Os3–N2 = 2.04(2), Os1–N3 = 2.13(2), Os3–N3 = 2.04(2), Os3–C15 = 2.08(2), Os2–C28 = 2.26(2), Os2–C29 = 2.33(2), Os2–C87 = 2.27(2), Os2–C88 = 2.27(2), Os3–C89 = 2.19(2), Os3–C90 = 2.25(2), C27–C28 = 1.53(3), C28–C29 = 1.50(3), C29–C30 = 1.54(3), C31–C32 = 1.34(3), C87–C88 = 1.45(2), C88–C89 = 1.47(2), C89–C90 = 1.56(3), N1–C6 = 1.26(2), N2–C13 = 1.27(2), N3–C20 = 1.30(2). Selected bond angles (deg): Os2–Os1–Os3 = 68.14(3), Os1–N1–Os2 = 90.0(6), Os2–N2–Os3 = 108.6(7), Os1–N3–Os3 = 90.9(6), N1–C6–C27 = 115(2), N2–C13–C30 = 112(2), N2–C13–C14 = 116(2), N3–C20–C21 = 127(2).

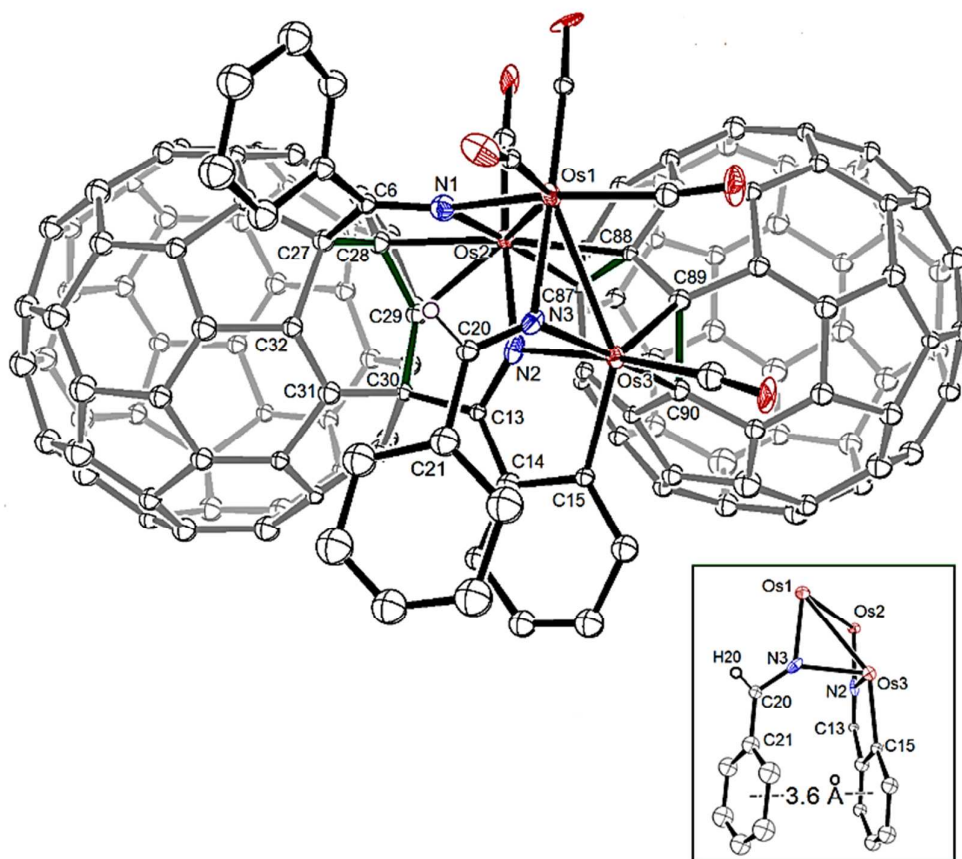

**Figure S-2.** ORTEP diagram of **3** with 30% probability ellipsoids. Selected bond distances (Å): Os1–Os2 = 2.9437(8), Os1–Os3 = 2.8606(9), Os2···Os3 = 3.331, Os1–N1 = 2.07(1), Os1–N2 = 2.12(1), Os2–N2 = 2.06(1), Os2–N3 = 2.02(1), Os3–N3 = 2.03(1), Os1–N4 = 2.04(1), Os3–N4 = 2.04(1), Os2–C21 = 2.06(1), Os2–C33 = 2.16(1), Os2–C34 = 2.21(1), Os3–C37 = 2.26(1), Os3–C38 = 2.19(1), Os3–C94 = 2.29(1), Os3–C95 = 2.28(1), C33–C34 = 1.49(2), C35–C36 = 1.37(2), C37–C38 = 1.46(2), C93–C94 = 1.57(2), C94–C95 = 1.45(2), C95–C96 = 1.58(2), C97–C98 = 1.38(2), N1–C5 = 1.16(2), N2–C12 = 1.30(2), N3–C19 = 1.25(2), N4–C26 = 1.25(2). Selected bond angles (deg): Os2–Os1–Os3 = 70.02(2), Os1–N1–C5 = 174(1), Os1–N2–Os2 = 89.5(5), Os2–N3–Os3 = 110.6(6), Os1–N4–Os3 = 89.0(4), N1–C5–C6 = 176(2), N2–C12–C13 = 125(1), N3–C19–C20 = 117(1), N3–C19–C93 = 114(1), N4–C26–C27 = 122(1), N4–C26–C96 = 117(1).

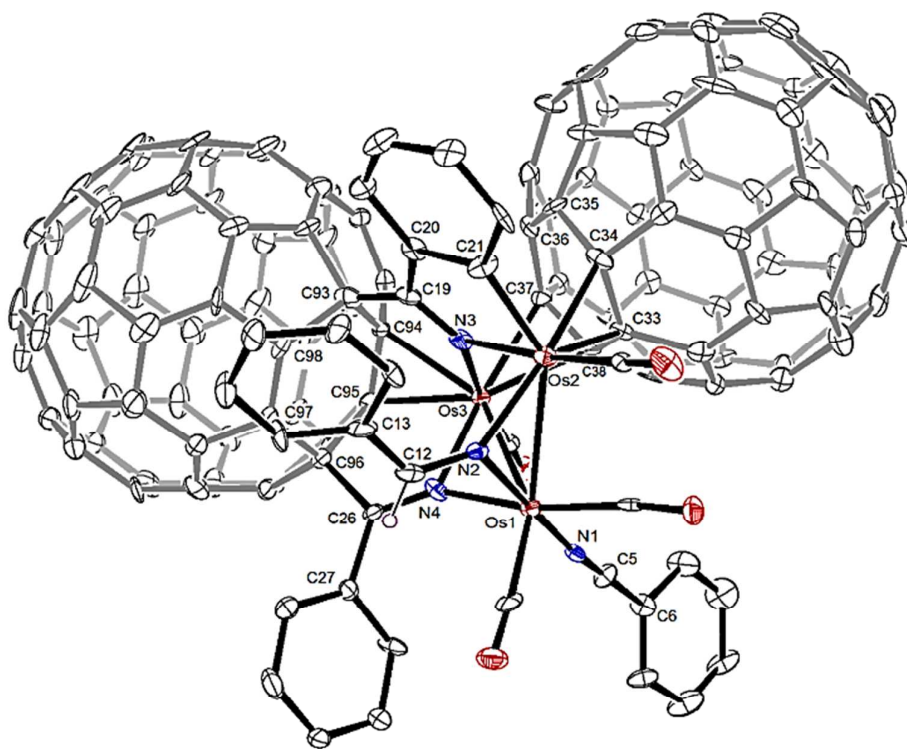

Supplement: Supplementary file 1 [file 3962287]
